# Supplementary material for: Development of Commercial Thermo-sensitive Genic Male Sterile Rice Accelerates Hybrid Rice Breeding Using the CRISPR/Cas9-mediated TMS5 Editing System
Source: PubMed Central journal article supplement (PMC5118805; doi:10.1038/srep37395), 2016-11-22
Supplement: srep37395-s1.pdf [file srep37395-s1.pdf]

## SUPPLEMENTARY INFORMATION

### **Development of Commercial Thermo-sensitive Genic Male Sterile Rice Accelerates Hybrid Rice Breeding Using the CRISPR/Cas9-mediated *TMS5* Editing System**

**Hai Zhou<sup>1,2,3</sup>, Ming He<sup>1,2,3</sup>, Jing Li<sup>1,2,3</sup>, Liang Chen<sup>1,2,3</sup>, Zhifeng Huang<sup>1,2,3</sup>,  
Shaoyan Zheng<sup>1,2,3</sup>, Liya Zhu<sup>1,2,3</sup>, Erdong Ni<sup>1,2,3</sup>, Dagang Jiang<sup>1,2,3</sup>, Bingran  
Zhao<sup>4</sup>, Chuxiong Zhuang<sup>1,2,3,†</sup>**

<sup>1</sup>State Key Laboratory for Conservation and Utilization of Subtropical Agro-bioresources, Guangzhou 510642, China

<sup>2</sup>Key Laboratory of Plant Functional Genomics and Biotechnology of Guangdong Provincial Higher Education Institutions, Guangzhou 510642, China

<sup>3</sup>College of Life Sciences, South China Agricultural University, Guangzhou 510642, China

<sup>4</sup>State Key Laboratory of Hybrid Rice, China National Hybrid Rice R&D Center, Changsha 410125, China

†Correspondence should be addressed to C.Z. ([zhuangcx@scau.edu.cn](mailto:zhuangcx@scau.edu.cn))

**SUPPLEMENTARY FIGURES 1-8**

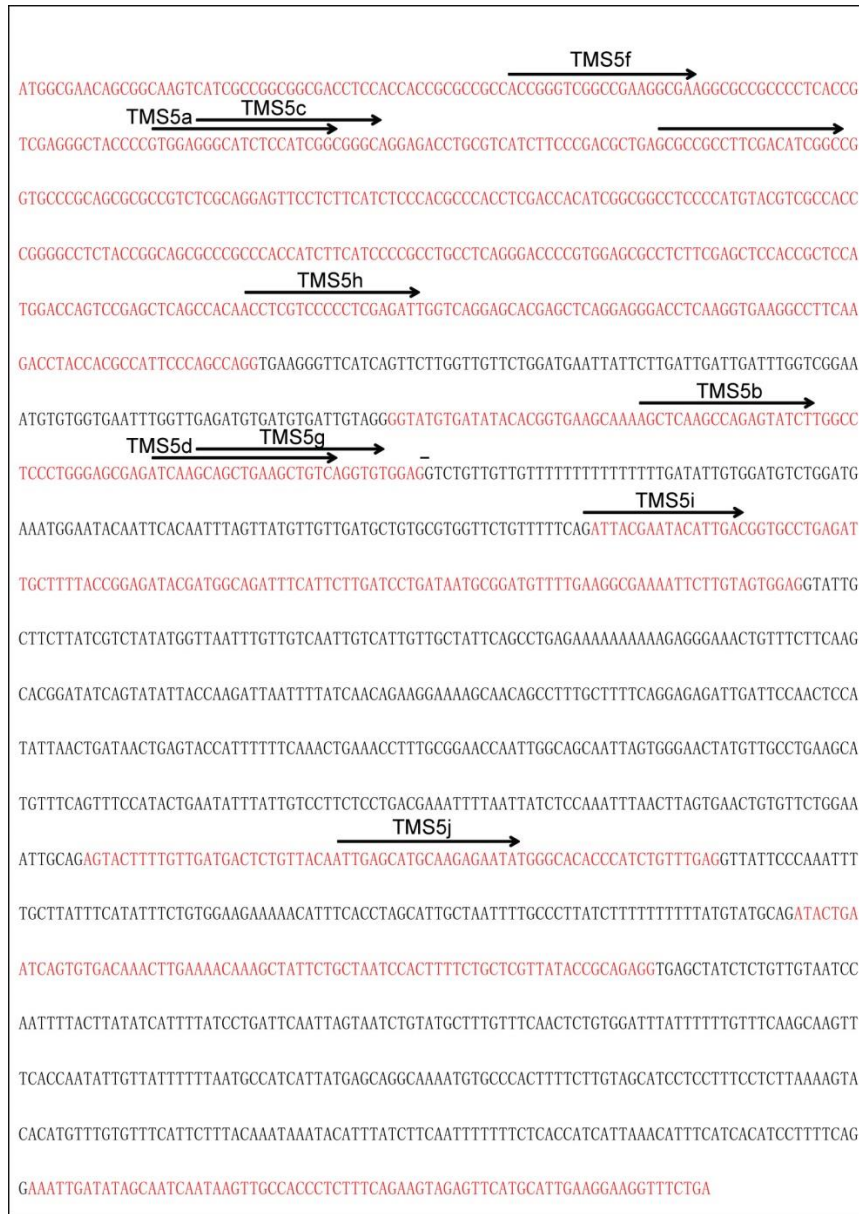

**Supplementary Figure 1. Ten target sites in *TMS5*.**

The exons and introns of *TMS5* are shown in red and black, respectively.

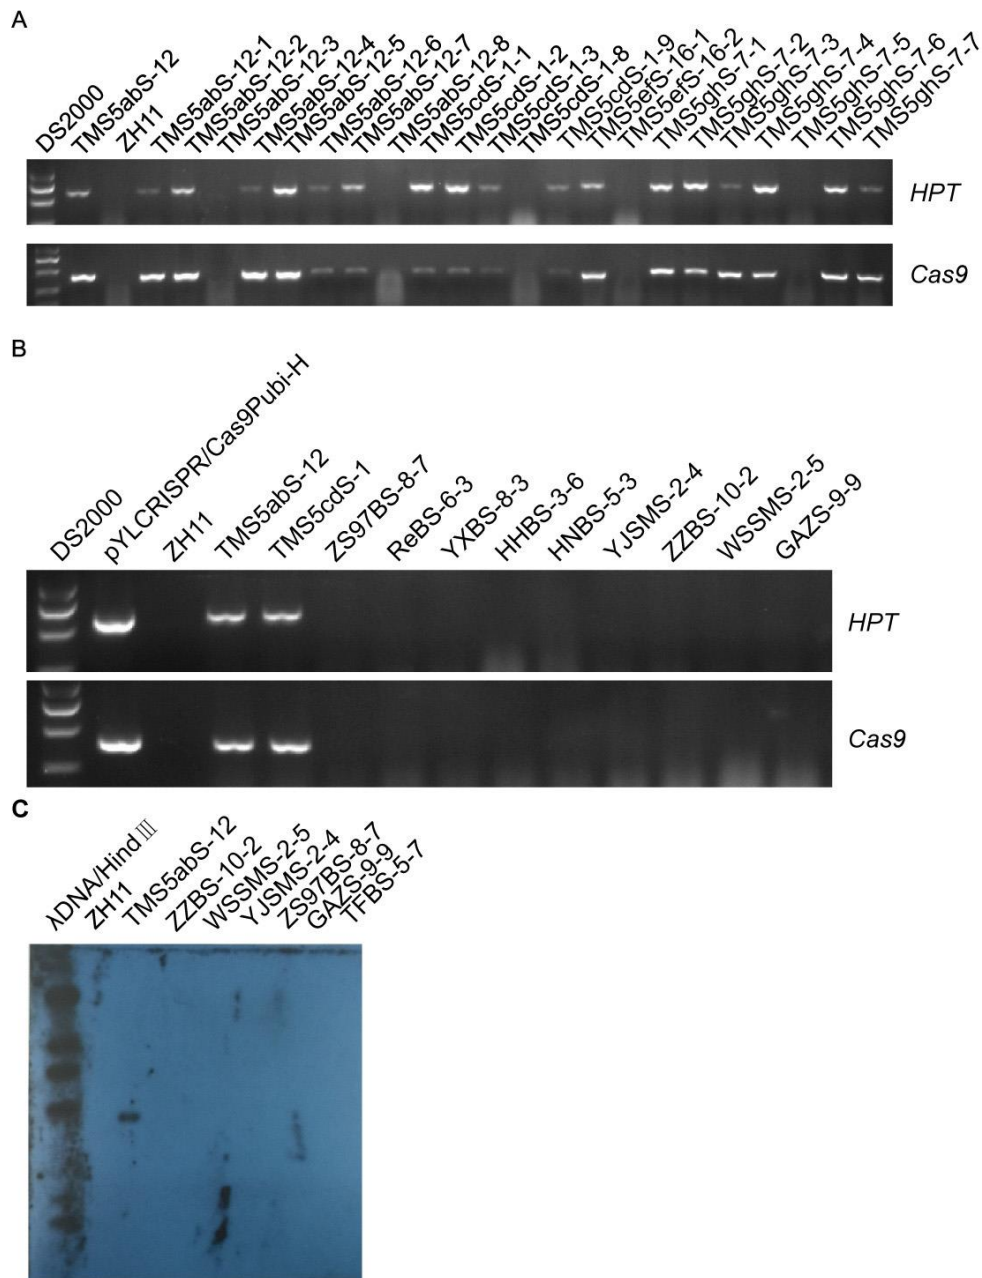

**Supplementary Figure 2. Detection of *hygromycin phosphotransferase (HPT)* and *Cas9* in T<sub>1</sub> generation plants.**

(A and B) *HPT* and *Cas9* are the selection markers for transgenic rice. (A) Detection of *HPT* and *Cas9* in T<sub>1</sub> generation plants of TMS5abS-12, TMS5cdS-1, TMS5efS-16 and TMS5ghS-7 using PCR. The wild type, ZH11, was a negative control, and TMS5abS-12 was a positive control for the transgene. TMS5abS12-1, 2, 3, 4, 5, 6, 7 and 8 are T<sub>1</sub> generation plants of TMS5abS-12. TMS5cdS1-1, 2, 3, 8 and 9 are T<sub>1</sub> generation plants of TMS5cdS-1. TMS5efS-16-1 and 2 are T<sub>1</sub> generation plants of

TMS5efS-16. TMS5ghS-7-1, 2, 3, 4, 5, 6 and 7 are T<sub>1</sub> generation plants of TMS5ghS-7. (B) Detection of *HPT* and *Cas9* in ZS97BS-8-7, ReBS-6-3, YXBS-8-3, HHBS-3-6, HNBS-5-3, YJSMS-2-4, ZZBS-10-2, WSSMS-2-5, GAZS-9-9 and TFBS-5-7 using PCR. ZS97BS-8-7, ReBS-6-3, YXBS-8-3, HHBS-3-6, HNBS-5-3, YJSMS-2-4, ZZBS-10-2, WSSMS-2-5, GAZS-9-9 and TFBS-5-7 are the T<sub>1</sub> generation TGMS plants induced by the TMS5ab system in the ZS97B, ReB, YXB, HHB, HNB, YJSM, ZZB, WSSM, GAZ, and TFB backgrounds, respectively. (C) Detection of *HPT* in the T<sub>3</sub> generation plants ZZBS-10-2, WSSMS-2-5, YJSMS-2-4, ZS97BS-8-7, GAZS-9-9 and TFBS-5-7 by Southern blotting. TMS5abS-12 was a positive control for the transgene.

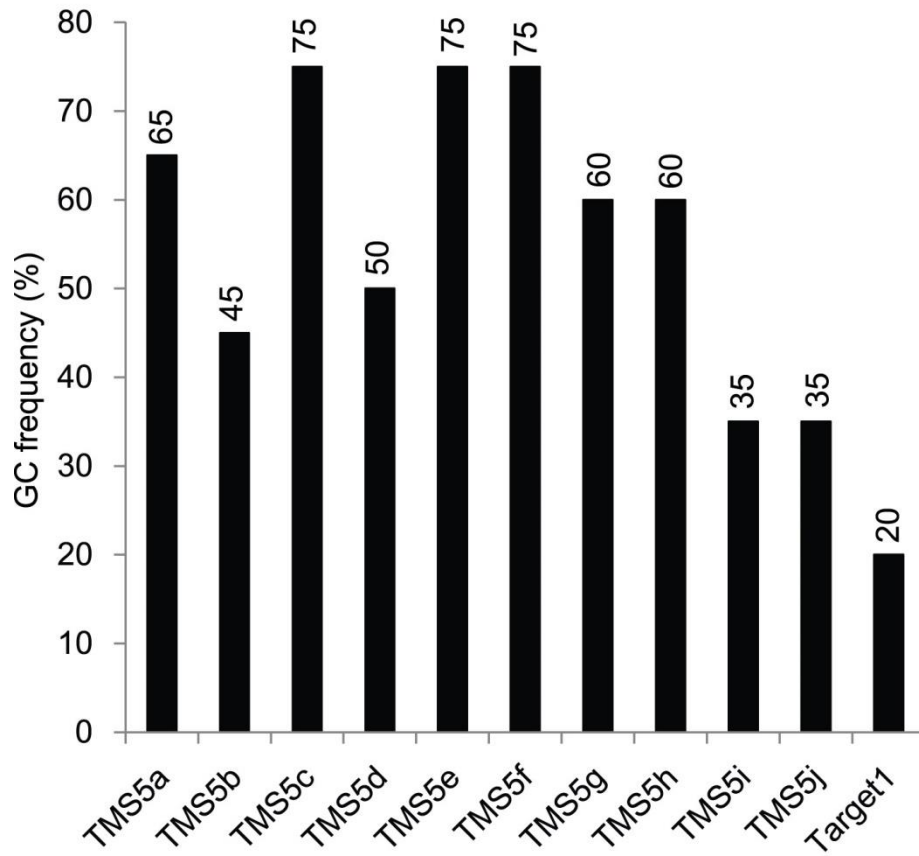

**Supplementary Figure 3. GC contents of the 11 target sequences.**

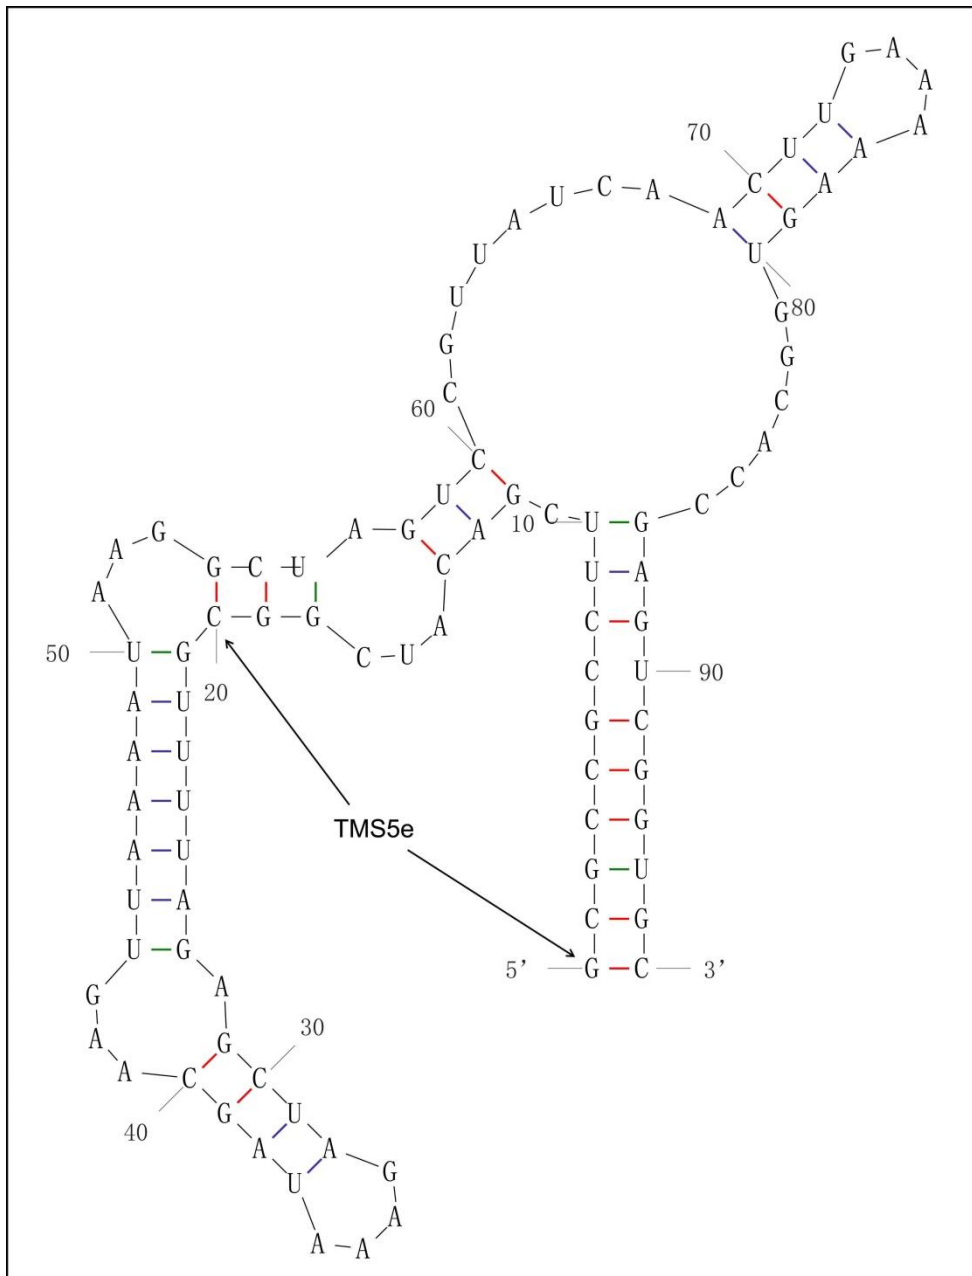

**Supplementary Figure 4. TMS5e-sgRNA secondary structure.**

The secondary structure of TMS5e-sgRNA was analysed using the RNA Folding Form (<http://unafold.rna.albany.edu/?q=mfold/RNA-Folding-Form>). The sequence between the two arrowheads indicates the TMS5e target sequence.

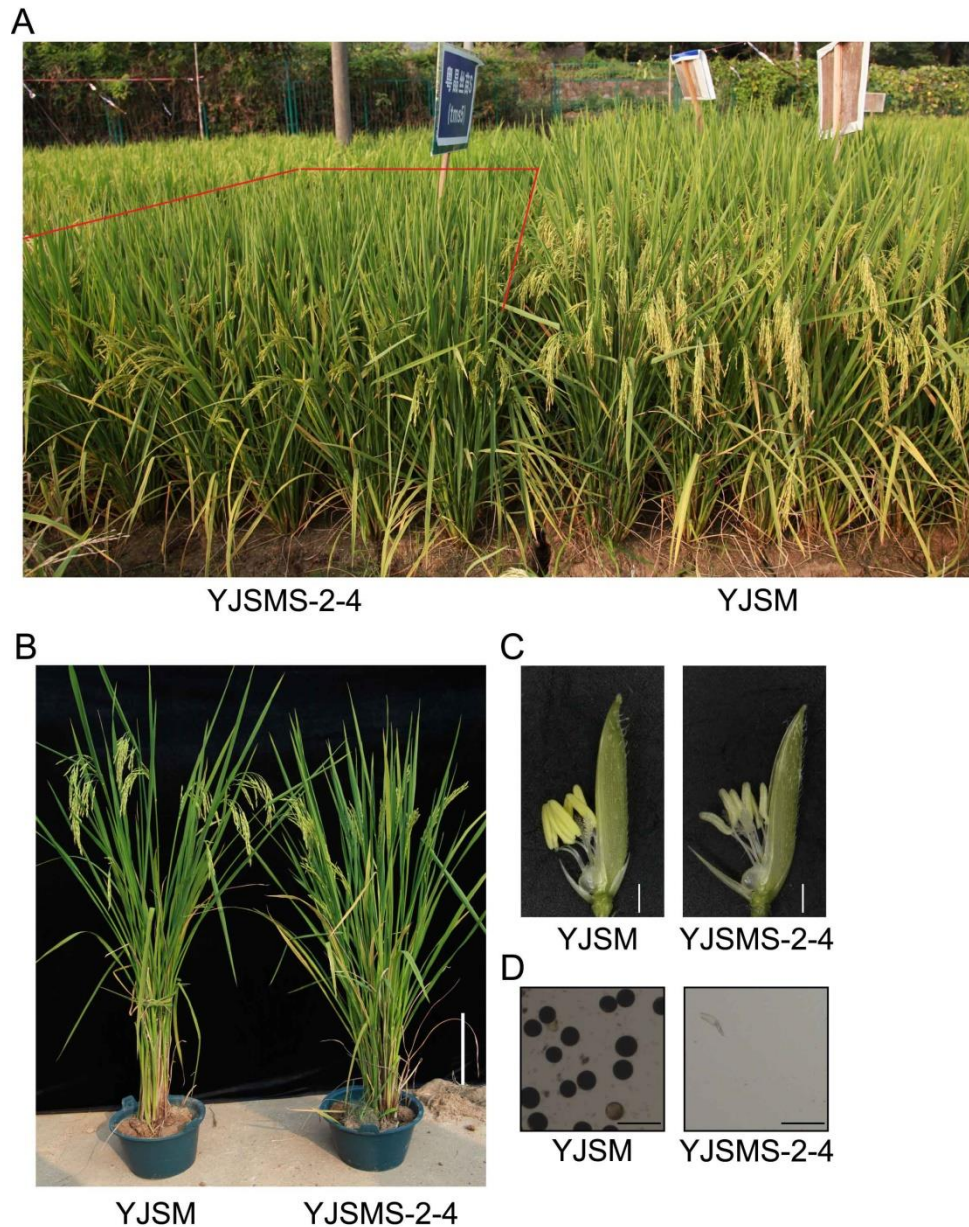

**Supplementary Figure 5. Phenotypes of YJSMS at high temperature.**

(A) Field performance of YJSMS and Yuejingshimiao (YJSMS) populations in the experimental plots of the China National Hybrid Rice R&D Center (Changsha) in the summer of 2015. The YJSMS population was grown in the area within the red line. (B) Plant morphologies of YJSMS and YJSMS at HT. (C) Anther phenotypes of YJSMS and YJSMS at HT. (D) Pollen fertility levels of YJSMS and YJSMS at HT. HT, high temperature; LT, low temperature. Scale bars, 20 cm in (B), 1 mm in (C), and 100  $\mu$ m in (D).

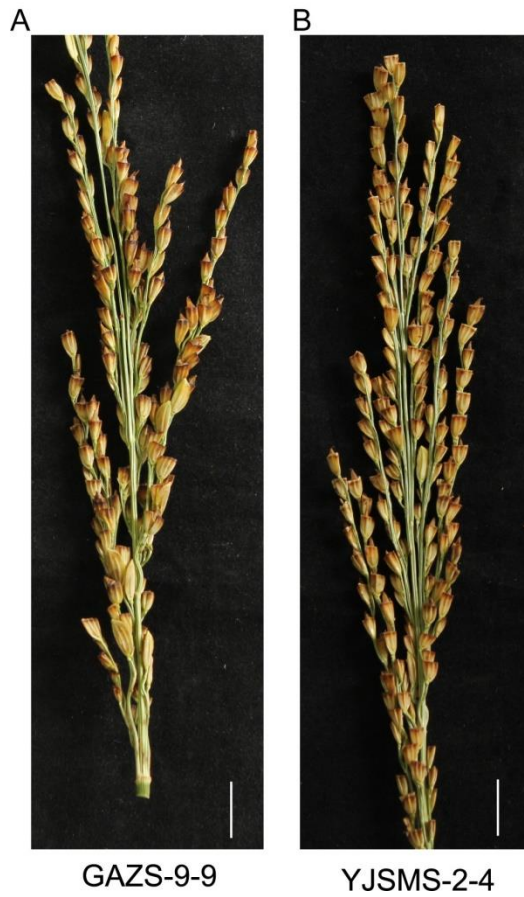

**Supplementary Figure 6. Seed settings of GAZS and YJSMS after artificial pollination.**

(A) Seed setting of GAZS-9-9 after pollination. (B) Seed setting of YJSMS-2-4 after pollination.



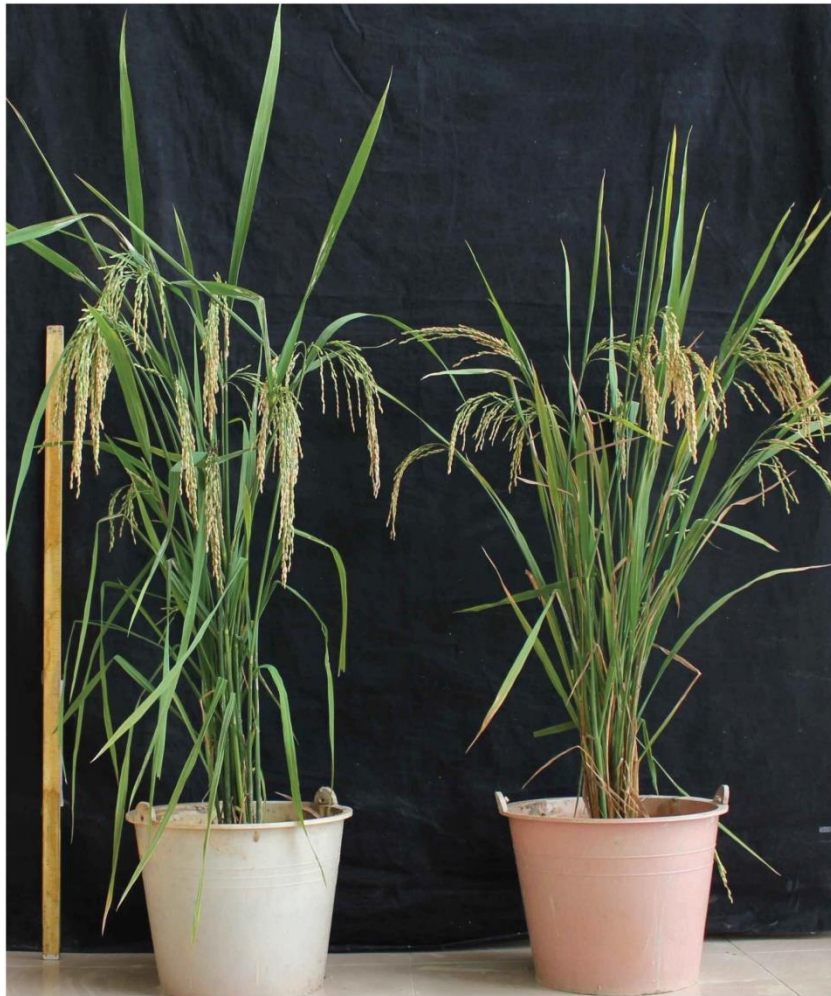

HNBS X HH1179

HNB

**Supplementary Figure 7. Phenotypes of HNB and the hybrid of HNBS × HH1179.**

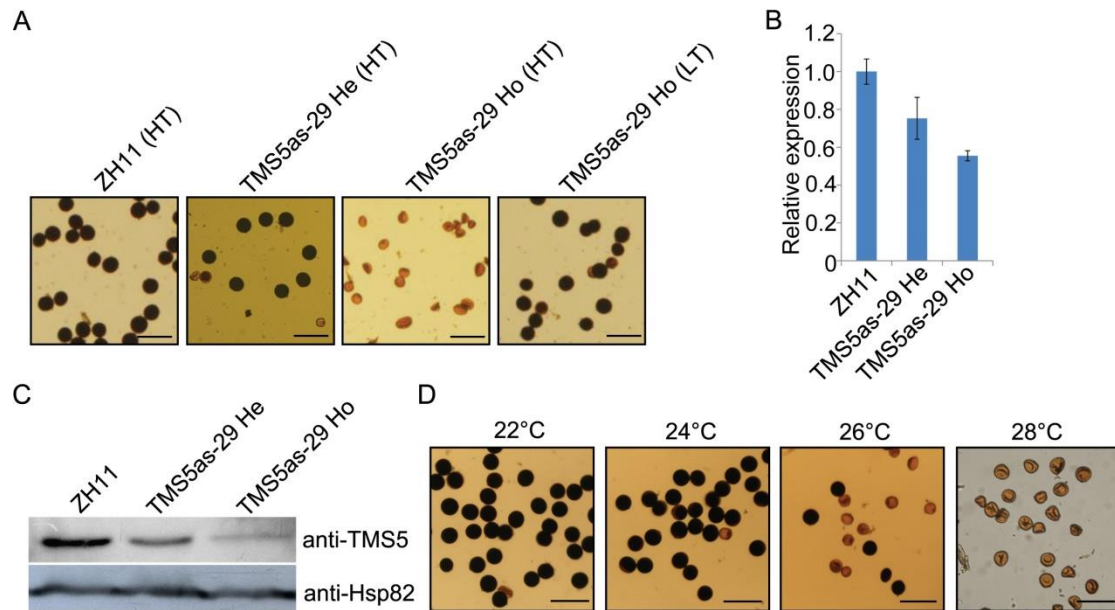

**Supplementary Figure 8. Pollen fertility and the *TMS5* expression level in *TMS5* knockdown plants using the antisense RNA technique.**

(A) Pollen fertility levels of ZH11 and *TMS5* antisense RNA plants (TMS5as-29He and Ho) at HT and LT. TMS5as-29He showed partial abortion, whereas TMS5as-29Ho displayed complete sterility at the HT. The fertility of TMS5as-29Ho was fully restored at the LT. He, heterozygote; Ho, homozygote. (B) Expression levels of *TMS5* in ZH11, TMS5as-29He and TMS5as-29Ho plants assessed by real-time PCR analysis. *TMS5* expression was slightly decreased in TMS5as-29He and TMS5as-29Ho plants compared with the ZH11. *OsActin1* was used as the internal control. (C) *TMS5* relative expression levels in ZH11, TMS5as-29He and TMS5as-29Ho plants using immunoblot analysis. HSP82 was used as the reference protein. *TMS5* protein expression was lower in TMS5as-29Ho plants compared with TMS5as-29He plants. (D) Pollen fertility levels of TMS5as-29Ho plants grown at 22 °C, 24 °C, 26 °C, and 28 °C under photoperiod conditions of 12 h of light and 12 h of darkness. Scale bars, 100 μm.

## SUPPLEMENTARY TABLES 1-4

**Supplementary Table 1. Target site sequences.**

| Target  | Sequence of target sites         |
|---------|----------------------------------|
| TMS5a   | GTGGAGGGCATCTCCATCGG <b>CGG</b>  |
| TMS5b   | AAGCTCAAGCCAGAGTATCT <b>TGG</b>  |
| TMS5c   | GGGCATCTCCATCGGCGGGC <b>AGG</b>  |
| TMS5d   | ATCAAGCAGCTGAAGCTGTC <b>AGG</b>  |
| TMS5e   | GCGCCGCCTTCGACATCGGC <b>CGG</b>  |
| TMS5f   | ACCGGGTCGGCCGAAGGCGA <b>AGG</b>  |
| TMS5g   | GCAGCTGAAGCTGTCAGGTG <b>TGG</b>  |
| TMS5h   | AACCTCGTCCCCCTCGAGAT <b>TGG</b>  |
| TMS5i   | GGAGATTACGAATACATTGA <b>CGG</b>  |
| TMS5j   | ATTGAGCATGCAAGAGAATA <b>TGG</b>  |
| Target1 | GATAAAAATTTTACTCTTGAT <b>TGG</b> |

Nucleotides in red represent the PAM motif of each target site.

**Supplementary Table 2. Segregation ratios of CRISPR/Cas9-mediated *TMS5* editing plants in the T<sub>1</sub> generation.**

| <b>T<sub>0</sub> lines</b> | <b>T<sub>1</sub> segregation ratio</b> |
|----------------------------|----------------------------------------|
| <b>GAZS-1</b>              | <b>9:4</b>                             |
| <b>GAZS-9</b>              | <b>24:5</b>                            |
| <b>YJSMS-2</b>             | <b>14:6</b>                            |
| <b>YJSMS-31</b>            | <b>16:9</b>                            |
| <b>ZS97BS-8</b>            | <b>20:6</b>                            |
| <b>ZS97BS-108</b>          | <b>18:3</b>                            |
| <b>YXBS-8</b>              | <b>11:9</b>                            |
| <b>HHBS-3</b>              | <b>14:6</b>                            |
| <b>HHBS-9</b>              | <b>17:4</b>                            |
| <b>WSSMS-2</b>             | <b>29:5</b>                            |
| <b>TFBS-5</b>              | <b>16:8</b>                            |
| <b>ZZBS-10</b>             | <b>16:4</b>                            |
| <b>ReBS-6</b>              | <b>27:2</b>                            |

**Segregation ratio = *HPT*- and *Cas9*-positive plants : *HPT*- and *Cas9*-negative plants.**

**Supplementary Table 3. Yield components of HNB and the HNBS × HH1179 hybrid.**

| Rice          | Length of main panicle (cm) | Increasing percentage (%) | Number of grains in main panicle | Increasing percentage (%) | Number of panicles | Increasing percentage (%) | Thousand seed weight (g) | Increasing percentage (%) |
|---------------|-----------------------------|---------------------------|----------------------------------|---------------------------|--------------------|---------------------------|--------------------------|---------------------------|
| HNB           | 22.6±1.1                    | -                         | 213±30                           | -                         | 8.2±1.1            | -                         | 19.7±0.4                 | -                         |
| HNBS × HH1179 | 29.7±1.3                    | 31.4**                    | 315±18                           | 47.9**                    | 7.6±0.5            | -7.3                      | 23.6±0.3                 | 19.8**                    |

  

| Rice          | Number of plants per plot | Setting rate (%) | Increasing percentage (%) | Yield per plant (g) | Increasing percentage (%) | Yield per plot (g) | Increasing percentage (%) |
|---------------|---------------------------|------------------|---------------------------|---------------------|---------------------------|--------------------|---------------------------|
| HNB           | 36                        | 88.4±2.9         | -                         | 20.9±0.5            | -                         | 753.3±10.4         | -                         |
| HNBS × HH1179 | 36                        | 82.2±0.9         | -7**                      | 23.9±0.1            | 14.4**                    | 872.7±28.7         | 15.9*                     |

T-tests were performed between HNB and the HNBS and HH1179 cross (\* and \*\* indicate  $P < 0.05$  and  $P < 0.01$ , respectively). There were three replicates for the plot and 15 replicates for the setting rate. All other assessments consisted of five replicates.

**Supplementary Table 4. Primers used for DNA constructs, sequencing, and transcript analysis.**

| Primer name | Primer sequence (5'-3')                | Purpose        |
|-------------|----------------------------------------|----------------|
| U-F         | CTCCGTTTTACCTGTGGAATCG                 | DNA constructs |
| gRNA-R      | CGGAGGAAAATTCCATCCAC                   | DNA constructs |
| Pps-GGL     | TTCAGAGGTCTCTCTCGCACTGGAATCGGCAGCAAAGG | DNA constructs |
| Pgs-GG2     | AGCGTGGGTCTCGTCAGGGTCCATCCACTCCAAGCTC  | DNA constructs |
| Pps-GG2     | TTCAGAGGTCTCTCTGACACTGGAATCGGCAGCAAAGG | DNA constructs |
| Pgs-GGR     | AGCGTGGGTCTCGACCGGGTCCATCCACTCCAAGCTC  | DNA constructs |
| TMS5a F     | GCCGTGGAGGGCATCTCCATCGG                | DNA constructs |
| TMS5a R     | AAACCCGATGGAGATGCCCTCCA                | DNA constructs |
| TMS5b F     | GGCAAGCTCAAGCCAGAGTATCT                | DNA constructs |
| TMS5b R     | AAACAGATACTCTGGCTTGAGCT                | DNA constructs |
| TMS5c F     | GCCGGGCATCTCCATCGGCGGGC                | DNA constructs |
| TMS5c R     | AAACGCCC GCCGATGGAGATGCC               | DNA constructs |
| TMS5d F     | GGCATCAAGCAGCTGAAGCTGTC                | DNA constructs |
| TMS5d R     | AAACGACAGCTTCAGCTGCTTGA                | DNA constructs |
| TMS5e F     | GCCGCGCCGCTTCGACATCGGC                 | DNA constructs |
| TMS5e R     | AAACGCCGATGTCTGAAGGCGGGC               | DNA constructs |
| TMS5f F     | GGCACCGGGTCGGCCGAAGGCGA                | DNA constructs |
| TMS5f R     | AAACTCGCTTCGGCCGACCCGG                 | DNA constructs |
| TMS5g F     | GCCGCAGCTGAAGCTGTGAGGTG                | DNA constructs |
| TMS5g R     | AAACCACCTGACAGCTTCAGCTG                | DNA constructs |
| TMS5h F     | GGCAACCTCGTCCCCCTCGAGAT                | DNA constructs |
| TMS5h R     | AAACATCTCGAGGGGGACGAGGT                | DNA constructs |
| TMS5i F     | GCCGGAGATTACGAATACATTGA                | DNA constructs |
| TMS5i R     | AAACTCAATGTATTTCGTAATCTC               | DNA constructs |
| TMS5j F     | GGCATTGAGCATGCAAGAGAATA                | DNA constructs |
| TMS5j R     | AAACTATTCTCTTGCATGCTCAA                | DNA constructs |
| Target1 F   | GCCGATAAAAATTTTACTCTTGA                | DNA constructs |
| Target1 R   | AAACTCAAGAGTAAAATTTTAT                 | DNA constructs |
| TMS5i F     | AAAAGGATCCGTCACACTGATTCAGTATCTC        | DNA constructs |
| TMS5i R     | AAAAAAGCTTCATGGACCAGTCCGAGCTC          | DNA constructs |
| RNAi-Mlu    | CACCCTGACGCGTGGTGTACTTCTGAAGAGG        | DNA constructs |
| RNAi-Pst    | ACTAGAACTGCAGCCTCAGATCTACCATGGTCG      | DNA constructs |
| TMS5as F    | AAAAAAAGCTTTGACAGCTTCAGCTGCTTG         | DNA constructs |
| TMS5as R    | AAAAAACTAGTATGGCGAACAGCGGCAAG          | DNA constructs |
| TMS5-4 F    | CGTGTTACCCCTTCCAACCT                   | DNA sequencing |
| TMS5-4 R    | GCTCGTGCTCCTGACCAATC                   | DNA sequencing |
| TMS5-5 F    | CAGGAGTTCCTCTTCATCTC                   | DNA sequencing |
| TMS5-5 R    | AGGCACCGTCAATGTATTCG                   | DNA sequencing |
| TMS5-6 F    | GTTGATGCTGTGCGTGGTTC                   | DNA sequencing |
| TMS5-6 R    | GGAATAACCTCAAACAGATGG                  | DNA sequencing |

|              |                          |                |
|--------------|--------------------------|----------------|
| TMS5a-4-1 F  | CACGAGATGCATGTGAGAAC     | DNA sequencing |
| TMS5a-4-1 R  | CAGGCCTATGATTCTAGGAG     | DNA sequencing |
| TMS5a-4-2 F  | GACTTCTAAGATACGGAAGAG    | DNA sequencing |
| TMS5a-4-2 R  | TGAACCAGGTTTCGACATAGG    | DNA sequencing |
| TMS5a-4-3 F  | CCAGTCAACTACTCAAGTCC     | DNA sequencing |
| TMS5a-4-3 R  | TGGAGATGGAGCTGAGCTGA     | DNA sequencing |
| TMS5a-11-1 F | CAACATCATCAATCCGAATCC    | DNA sequencing |
| TMS5a-11-1 R | TGAGGTACCGATACTCGTG      | DNA sequencing |
| TMS5a-12-1 F | GCTACGTTCTCATCGTCTCG     | DNA sequencing |
| TMS5a-12-1 R | CAGGAATCAGTAATGCACTGG    | DNA sequencing |
| TMS5b-1-1 F  | CGATCTTGATGATCTCACTCG    | DNA sequencing |
| TMS5b-1-1 R  | CACTCGTTAGTCAACTGGAAC    | DNA sequencing |
| TMS5b-3 F    | GAAATGATGGGTACAGTGTGG    | DNA sequencing |
| TMS5b-3 R    | GAGGAGAACGATGACGTTGG     | DNA sequencing |
| TMS5b-1-2 F  | TCGGTGTGTGGTGAATCAG      | DNA sequencing |
| TMS5b-1-2 R  | TCGTCGTGCTATCCATGCAC     | DNA sequencing |
| TMS5b-4 F    | ACATGGTAGTGCTCACATGC     | DNA sequencing |
| TMS5b-4 R    | GTGTTGTCCTTGGTCTTGAC     | DNA sequencing |
| TMS5b-5 F    | GTCTGATCCATTCCGTCATG     | DNA sequencing |
| TMS5b-5 R    | CAACACTGTCACTAACACGTC    | DNA sequencing |
| TMS5b-7 F    | GAGCAAGTCTCATCTCACTG     | DNA sequencing |
| TMS5b-7 R    | TCTCTTGAGATGCTGTGGTC     | DNA sequencing |
| TMS5b-8 F    | GTTACTCCGTGGTACTAAGC     | DNA sequencing |
| TMS5b-8 R    | GAGTCATACATCCACGACTC     | DNA sequencing |
| TMS5b-12 F   | CAAGGCACAGATTGATGGAG     | DNA sequencing |
| TMS5b-12 R   | GGTAGTAGGGTAAATGAGACG    | DNA sequencing |
| TMS5q F      | TCTGCTAATCCACTTTTCTGCTC  | RT-qPCR        |
| TMS5q R      | CCTTCCTTCAATGCATGAACTCT  | RT-qPCR        |
| OsActin1q F  | CACATTCCAGCAGATGTGGA     | RT-qPCR        |
| OsActin1q R  | GCGATAACAGCTCCTCTTGG     | RT-qPCR        |
| sgRNAq F     | GTTTTAGAGCTAGAAATAGCAAG  | RT-qPCR        |
| sgRNAq R     | CGACTCGGTGCCACTTTTTTC    | RT-qPCR        |
| sgRNA RT     | AAAAGCACCGA              | RT-qPCR        |
| CAS9q F      | ATCGACAGGAAGCGTTACAC     | RT-qPCR        |
| CAS9q R      | CTGGGAAAGGTCGATACGAG     | RT-qPCR        |
| HPT F        | GTCCGTCAGGACATTGTTGGAG   | Genotyping     |
| HPT R        | GTCTCCGACCTGATGCAGCTCCGG | Genotyping     |
| Cas9 F       | CTCTTCCTTCCAAGTACGTG     | Genotyping     |
| Cas9 R       | GAAAGGTCGATACGAGTCTC     | Genotyping     |

---
